# Supplementary material
Source: Elsevier journal article supplement (https://www.sciencedirect.com/science/article/pii/S0212656719303786)
Supplement: mmc1 [file S0212656719303786:mmc1.docx]

Tabla anexa 1. Comparación según sexo, edad, clase social y lugar de nacimiento, de la muestra estudiada con el grupo de personas excluidas porque no habían contestado a un mínimo de 6 ítems del PCAT-A10. Se presentan las distribuciones porcentuales y la significación estadística si α ≤ 0,05.

|  | Excluídos por contestar menos de 6 ítems (n= 176) | | Muestra estudiada  (n= 3107) | | Muestra total  (n= 3.283) | |
| --- | --- | --- | --- | --- | --- | --- |
|  | N | % | N | % | N | % |
| Sexo* |  |  |  |  |  |  |
| Mujeres | 72 | 40,8 | 1687 | 54,3 | 1759 | 53,6 |
| Hombres | 104 | 59,2 | 1419 | 45,7 | 1524 | 46,4 |
| P valor | 0,001 |  |  |  |  |  |
| Edad (años)* |  |  |  |  |  |  |
| 15-44 | 109 | 64,3 | 1362 | 43,8 | 1475 | 44,9 |
| 45-64 | 42 | 24,0 | 934 | 30,0 | 976 | 29,7 |
| 65 y más | 21 | 11,7 | 811 | 26,2 | 832 | 25,4 |
| P valor | > 0,001 |  |  |  |  |  |
| Clase social |  |  |  |  |  |  |
| No manuales | 80 | 45,3 | 1519 | 48,9 | 1598 | 48,7 |
| Manuales | 64 | 36,1 | 1224 | 39,4 | 1288 | 39,2 |
| No consta | 32 | 18,6 | 364 | 11,7 | 397 | 12,1 |
| Lugar de nacimiento* |  |  |  |  |  |  |
| Cataluña | 104 | 59,2 | 1830 | 58,9 | 1934 | 58,9 |
| Países de renta alta | 31 | 17,8 | 482 | 15,5 | 514 | 15,6 |
| Resto del estado español | 17 | 9,7 | 565 | 18,2 | 582 | 17,7 |
| Países de renta baja | 22 | 12,3 | 224 | 7,2 | 245 | 7,5 |
| No consta | 2 | 1,0 | 6 | 0,2 | 8 | 0,3 |
| P valor | 0,004 |  |  |  |  |  |

Nota: la clase social se obtuvo a partir de última ocupación de la persona o del sustentador/a principal, siguiendo la propuesta de la Sociedad Española de Epidemiología, agrupando en clases no manuales, las clases sociales I, II y III (clases socioeconómicamente más favorecidas) , y en manuales, las clases sociales IV y V (menos favorecidas).

Tabla anexa 2. Comparación según sexo, edad, clase social y lugar de nacimiento, del grupo de personas de la muestra que no han contestado ningún “No lo sé” a ningún ítem del PCAT-A10, es decir, contestan los 10 ítems, con el grupo de personas de la muestra que han contestado algún “No lo sé”. Se presentan las distribuciones porcentuales y la significación estadística si α ≤ 0,05.

|  | Contestan los 10 ítems (n= 1.343) | | Contestan algún “No lo sé” (n= 1.764) | | Muestra total (n= 3.107) | |
| --- | --- | --- | --- | --- | --- | --- |
|  | N | % | N | % | N | % |
| Sexo |  |  |  |  |  |  |
| Mujeres | 717 | 53,1 | 970 | 55,0 | 1687 | 45,7 |
| Hombres | 626 | 46,6 | 794 | 45,0 | 1419 | 54,3 |
| Edad (años)* |  |  |  |  |  |  |
| 15-44 | 553 | 41,2 | 809 | 45,9 | 1362 | 43,8 |
| 45-64 | 418 | 31,1 | 516 | 29,2 | 934 | 30,1 |
| 65 y más | 372 | 27,7 | 439 | 24,9 | 811 | 26,1 |
| P valor | 0,03 |  |  |  |  |  |
| Clase social |  |  |  |  |  |  |
| No manuales | 674 | 50,2 | 845 | 47,9 | 1519 | 48,9 |
| Manuales | 514 | 38,3 | 710 | 40,2 | 1224 | 39,4 |
| No consta | 155 | 11,5 | 209 | 11,9 | 364 | 11,7 |
| Lugar de nacimiento |  |  |  |  |  |  |
| Cataluña | 813 | 60,6 | 1017 | 57,6 | 1830 | 58,9 |
| Países de renta alta | 217 | 16,1 | 265 | 15,1 | 482 | 15,5 |
| Resto del estado español | 219 | 16,3 | 346 | 19,6 | 565 | 18,2 |
| Países de renta baja | 92 | 6,8 | 132 | 7,5 | 224 | 7,2 |
| No consta | 2 | 0,2 | 4 | 0,2 | 6 | 0,2 |

Nota: la clase social se obtuvo a partir de última ocupación de la persona o del sustentador/a principal, siguiendo la propuesta de la Sociedad Española de Epidemiología, agrupando en clases no manuales, las clases sociales I, II y III (clases socioeconómicamente más favorecidas) , y en manuales, las clases sociales IV y V (menos favorecidas).
